# Supplementary material for: Epidermal-growth-factor-induced proliferation of astrocytes requires Egr transcription factors
Source: Oxford University Press journal article supplement (doi:10.1242/jcs.048272), 2009-08-26

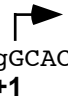

agcgggttttc atcttcccac gctgtctcgg gctgggtgcc cagaaaggaa acccagGCAC

+1

CCCATTGCAG GCCTCTGTCT CCCGCACCCT ATCCTTACAC AGCTTGTGCT CTACGGGACT

GGAGATTTCC AAAGCCTGAC TTGATCCCTC CCCAGTTCAG ACCCTCTGTT AAAAGGCAGG

AGCGGAGAAA GTTAGAAACT TGCATTTAAA CTTTAGGAGC TGCGTCACCG CAGTCTCCTG

GAGAAAGCTC TGCCTAGCGG GACAGATTCT TTGCAACTTG GAGGCGCCGG GCGTGGGGAG

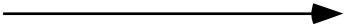

**EBS**

GAGGCGGGCG GCGGG**GCGGG GCGG**CACGGG GCCGGGGTGC AGGCGGGGAC GCGGGGTGAC

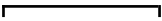

GCGGCCCCAG GCCGCTGTAC ACTCAAGGGG CTCCCTCGGC TTCAGGAAGA GTCCGGCTGC

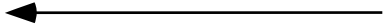

ACTGGTCTGG GAACCCGGCG GGACACGGAC TGGGAGGCTG GCAGCCCGCG GGCGAGCCCG

GCTGGGGGGC CGAGGCCGGG GTCGGGGCCG GGGAGCCCCA AGAGCTGCCA CAGCGGGGTC

CCGGGGCCGC GGAAGGGC**A TG**GCTGCCAG CGGCATCACC TCGCTTCCCG CACTGCCGGA

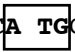

Supplement: jcs048272figs1.pdf [file jcs048272figs1.pdf]
