# Supplementary figures and images for: Epidermal-growth-factor-induced proliferation of astrocytes requires Egr transcription factors
Source: Oxford University Press journal article supplement (doi:10.1242/jcs.048272), 2009-08-26

**A**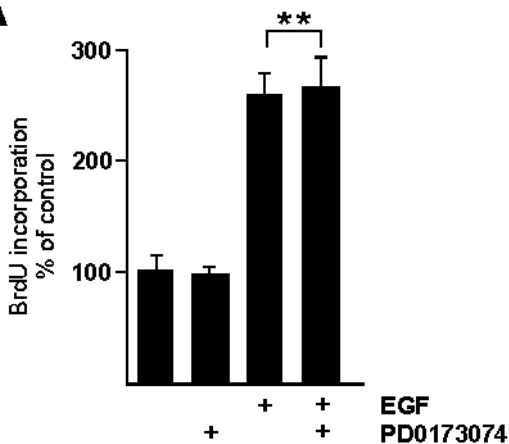**B**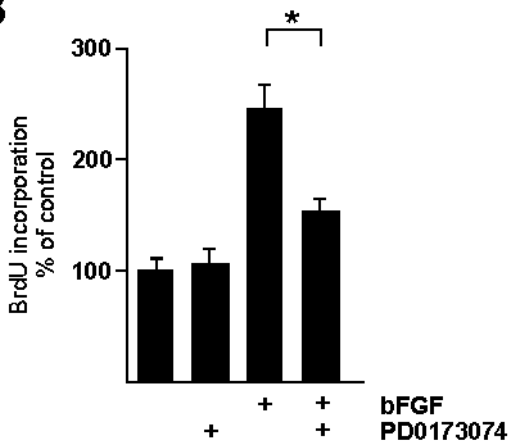

Supplement: jcs048272figs2.pdf [file jcs048272figs2.pdf]
